# Supplementary material
Source: PubMed Central journal article supplement (PMC5582131)
Supplement: rsif20170408supp1.pdf [file rsif20170408supp1.pdf]

## Supplementary material

### A biophysical approach to daunorubicin interaction with model membranes: relevance for the drug's biological activity

Ana Catarina Alves<sup>1</sup>, Daniela Ribeiro<sup>1</sup>, Miguel Horta<sup>1</sup>, José L.F.C. Lima<sup>1</sup>, Cláudia Nunes<sup>1\*</sup> and Salette Reis<sup>1</sup>

<sup>1</sup>UCIBIO, REQUIMTE, Departamento de Ciências Químicas, Faculdade de Farmácia, Universidade do Porto, Portugal

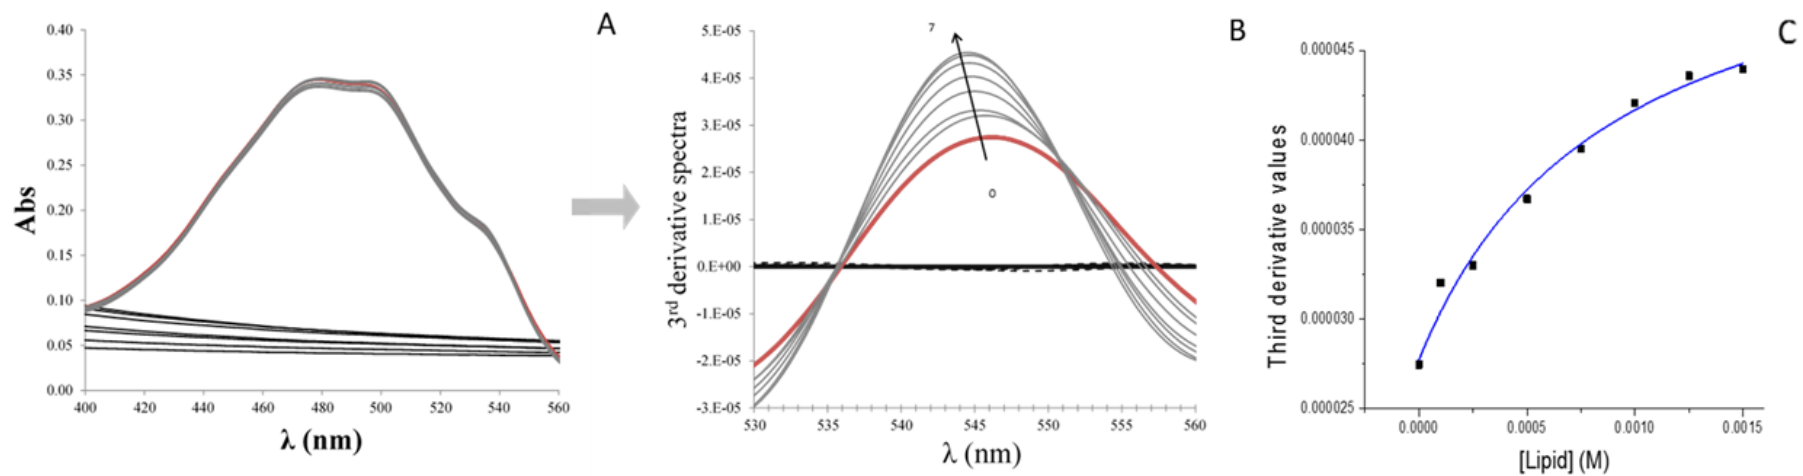

Figure 1: Absorption (A) and third-derivative absorption (B) spectra of daunorubicin (40  $\mu$ M) (red line, 0) alone, incubated in DMPC:SM model membrane at 37 °C with increasing lipid concentration (7, represents the maximum lipid concentration) and the model membrane without drug (black dashed lines). Plot (C) represents the best fitting curve to experimental third-derivative spectrophotometric data ( $D_T$  vs. [L]) using a nonlinear regression method at a wavelength of 546 nm.

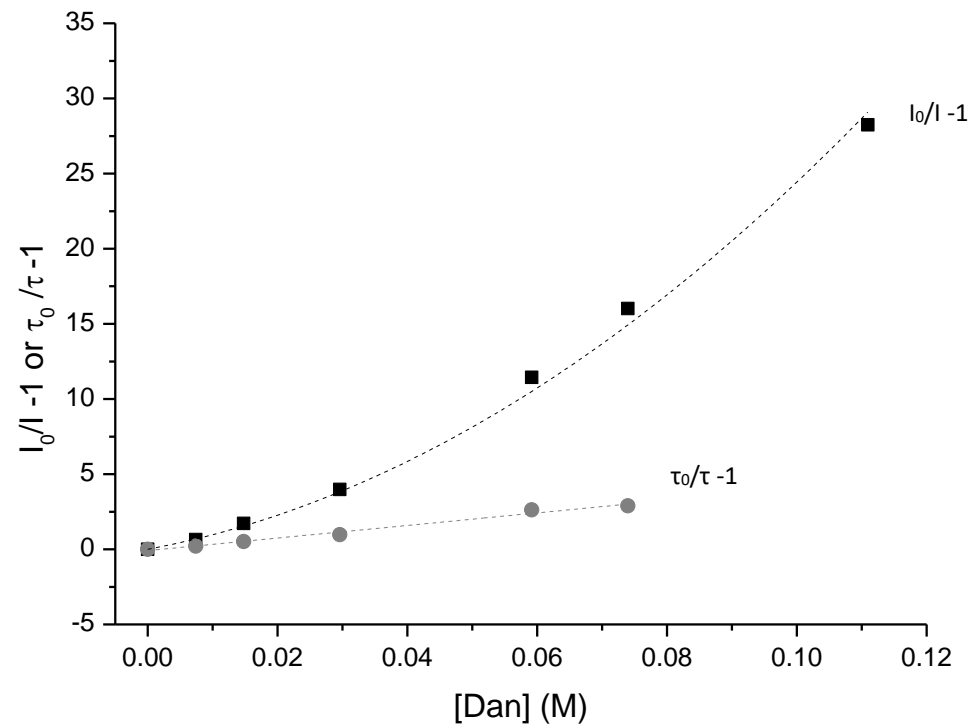

**Figure 2: Stern–Volmer plots of the probe DPH in the DMPC:SM model at pH 7.4 and 37 °C with increasing daunorubicin concentrations: square symbols (■) represent the Stern–Volmer plot obtained by steady-state fluorescence measurements ( $I_0/I - 1$ ) and circle symbols (●) represent the Stern–Volmer plot obtained by lifetime fluorescence measurements ( $\tau_0/\tau - 1$ ).**
